# Supplementary material for: Effectiveness and cost-effectiveness of a pragmatic clinical trial of the New Medicine Service intervention in Spanish community pharmacies
Source: Research Square preprint supplement (doi:10.21203/rs.3.rs-6871385/v1), 2025-07-23
Supplement: Supplementary file 1 [file 91341fc46314706c43f9084e.pdf]

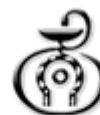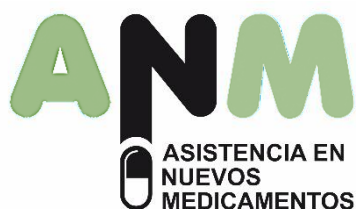

## CUESTIONARIO ASISTENCIA EN NUEVOS TRATAMIENTOS

# 2

## MEDIDA INTERMEDIA 2 MESES

Nombre y apellidos paciente:

DNI:

Teléfono:

Fecha segunda medición:

Código AXONFARMA<sup>1</sup>:

¿El paciente ha cambiado el tratamiento a estudio en los dos últimos meses?

- ☐ Sí. -----> *Fin de cuestionario. Causa de abandono del estudio.*
- ☐ No.

En vigencia con el Reglamento Europeo de Protección de Datos (2016/679) los datos obtenidos serán de carácter confidencial, éstos datos serán organizados con un número asignado. Los datos recogidos estarán anonimizados y estarán a disposición del equipo de investigación de este estudio **“Efectividad de una intervención para mejorar la adherencia al tratamiento a nuevos medicamentos desde la farmacia comunitaria”**, para el posterior desarrollo de informes y publicaciones dentro de revistas científicas. La información recopilada no será utilizada para ningún otro propósito.

---

<sup>1</sup> Sólo en farmacias intervención

## Características clínicas

- Enfermedad objeto a estudio. *(Seleccione sólo una opción).*

- ☐ Hipertensión.
- ☐ EPOC.
- ☐ Diabetes.
- ☐ Anticoagulados.

- (SÓLO CONTESTAR SI HIPERTENSIÓN) Valor de la presión arterial:

-Presión máxima (sistólica):  mm Hg

-Presión mínima (diastólica):  mm Hg

- (SÓLO CONTESTAR SI EPOC)

|                                                                               |           |                                                                                     |
|-------------------------------------------------------------------------------|-----------|-------------------------------------------------------------------------------------|
| Nunca toso                                                                    | ① ② ③ ④ ⑤ | Siempre estoy tosiendo                                                              |
| No tengo flema (mucosidad) en el pecho                                        | ① ② ③ ④ ⑤ | Tengo el pecho completamente lleno de flema (mucosidad)                             |
| No siento ninguna opresión en el pecho                                        | ① ② ③ ④ ⑤ | Siento mucha opresión en el pecho                                                   |
| Cuando subo una pendiente o un tramo de escaleras, no me falta el aire        | ① ② ③ ④ ⑤ | Cuando subo una pendiente o un tramo de escaleras, me falta mucho el aire           |
| No me siento limitado para realizar actividades domésticas                    | ① ② ③ ④ ⑤ | Me siento muy limitado para realizar actividades domésticas                         |
| Me siento seguro al salir de casa a pesar de la afección pulmonar que padezco | ① ② ③ ④ ⑤ | No me siento nada seguro al salir de casa debido a la afección pulmonar que padezco |
| Duermo sin problemas                                                          | ① ② ③ ④ ⑤ | Tengo problemas para dormir debido a la enfermedad pulmonar que padezco             |
| Tengo mucha energía                                                           | ① ② ③ ④ ⑤ | No tengo ninguna energía                                                            |

## Calidad de vida relacionada con la salud (EQ-5D)

Debajo de cada enunciado, **marque UNA casilla**, la que mejor describe su salud **HOY**.

### **B1. MOVILIDAD**

- No tengo problemas para caminar ----- ☐ (1)  
Tengo problemas leves para caminar ----- ☐ (2)  
Tengo problemas moderados para caminar ----- ☐ (3)  
Tengo problemas graves para caminar ----- ☐ (4)  
No puedo caminar ----- ☐ (5)

### **B2. AUTO-CUIDADO**

- No tengo problemas para lavarme o vestirme ----- ☐ (1)  
Tengo problemas leves para lavarme o vestirme ----- ☐ (2)  
Tengo problemas moderados para lavarme o vestirme ----- ☐ (3)  
Tengo problemas graves para lavarme o vestirme ----- ☐ (4)  
No puedo lavarme o vestirme ----- ☐ (5)

### **B3. ACTIVIDADES COTIDIANAS** (Ej.: trabajar, estudiar, hacer las tareas domésticas, actividades familiares o actividades durante el tiempo libre)

- No tengo problemas para realizar mis actividades cotidianas ----- ☐ (1)  
Tengo problemas leves para realizar mis actividades cotidianas ----- ☐ (2)  
Tengo problemas moderados para realizar mis actividades cotidianas ----- ☐ (3)  
Tengo problemas graves para realizar mis actividades cotidianas ----- ☐ (4)  
No puedo realizar mis actividades cotidianas ----- ☐ (5)

### **B4. DOLOR / MALESTAR**

- No tengo dolor ni malestar ----- ☐ (1)  
Tengo dolor o malestar leve ----- ☐ (2)  
Tengo dolor o malestar moderado ----- ☐ (3)  
Tengo dolor o malestar fuerte ----- ☐ (4)  
Tengo dolor o malestar extremo ----- ☐ (5)

### B5 .ANSIEDAD / DEPRESIÓN

- No estoy ansioso ni deprimido----- ☐ (1)  
 Estoy levemente ansioso o deprimido ----- ☐ (2)  
 Estoy moderadamente ansioso o deprimido ----- ☐ (3)  
 Estoy muy ansioso o deprimido----- ☐ (4)  
 Estoy extremadamente ansioso o deprimido----- ☐ (5)

Nos gustaría conocer lo buena o mala que es su salud  
HOY.

La escala está numerada del 0 al 100.

100 representa la mejor salud que usted se pueda  
imaginar.

0 representa la peor salud que usted se pueda  
imaginar.

Marque con una X en la escala para indicar cuál es su  
estado de salud HOY.

Ahora, en la casilla que encontrará a continuación  
escriba el número que ha marcado en la escala.

B6. SU SALUD HOY

La mejor salud que  
usted se pueda imaginar

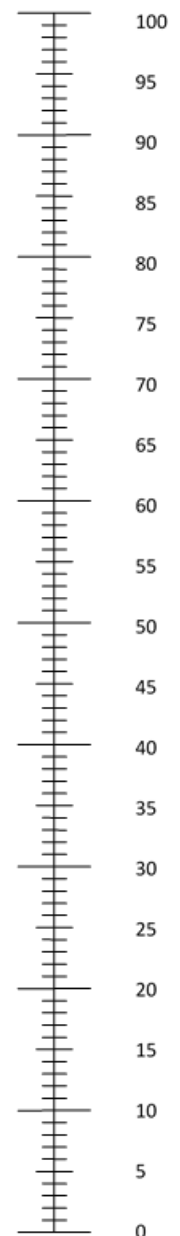

La peor salud  
que usted se pueda  
imaginar

## Satisfacción con el tratamiento basado en fármacos crónicos (SATMED-Q)

En cada pregunta, tache el número que mejor refleja su opinión. No existen respuestas correctas o incorrectas. Si no está seguro de alguna de las respuestas, indique la que le parezca más adecuada.

C1. Ha experimentado algún efecto secundario producido por la medicación:

- ☐ No, ninguno.
- ☐ Sí, alguno.

C2. Esta sección hace referencia a los **efectos indeseables** producidos por la medicación.

|                                                                                                    | No,<br>nada | Algo | Ni mucho<br>no poco | Bastante | Sí,<br>mucho |
|----------------------------------------------------------------------------------------------------|-------------|------|---------------------|----------|--------------|
| 1. Los efectos secundarios de la medicación interfieren en mi actividad física.                    | ①           | ②    | ③                   | ④        | ⑤            |
| 2. Los efectos secundarios de la medicación interfieren en mis actividades de ocio y tiempo libre. | ①           | ②    | ③                   | ④        | ⑤            |
| 3. Los efectos secundarios de la medicación interfieren en mis tareas cotidianas.                  | ①           | ②    | ③                   | ④        | ⑤            |

C3. Esta sección se refiere a la **eficacia de la medicación**, es decir, de su capacidad para tratar su enfermedad y aliviar sus síntomas.

|                                                                                      | No,<br>nada | Algo | Ni mucho<br>no poco | Bastante | Sí,<br>mucho |
|--------------------------------------------------------------------------------------|-------------|------|---------------------|----------|--------------|
| 4. La medicación que estoy tomando alivia mis síntomas.                              | ①           | ②    | ③                   | ④        | ⑤            |
| 5. Estoy satisfecho con el tiempo que tarda el medicamento en empezar a hacer efecto | ①           | ②    | ③                   | ④        | ⑤            |
| 6. Me encuentro mejor ahora de lo que me encontraba antes de iniciar el tratamiento. | ①           | ②    | ③                   | ④        | ⑤            |

C4. Esta sección hace referencia a la **comodidad de la medicación** y la facilidad para tomarla.

|                                                                                         | No,<br>nada | Algo | Ni mucho<br>no poco | Bastante | Sí,<br>mucho |
|-----------------------------------------------------------------------------------------|-------------|------|---------------------|----------|--------------|
| 7. Me resulta cómodo tomar mi medicación.                                               | ①           | ②    | ③                   | ④        | ⑤            |
| 8. Me resulta fácil usar/tomar el medicamento en su forma actual (sabor, tamaño, etc.). | ①           | ②    | ③                   | ④        | ⑤            |
| 9. El horario de las tomas me resulta cómodo.                                           | ①           | ②    | ③                   | ④        | ⑤            |

C5. Esta sección hace referencia al **impacto de la medicación** en su vida cotidiana.

|                                                                                                            | No,<br>nada | Algo | Ni mucho<br>no poco | Bastante | Sí,<br>mucho |
|------------------------------------------------------------------------------------------------------------|-------------|------|---------------------|----------|--------------|
| 10. Gracias a la medicación que estoy tomando puedo realizar mejor mis actividades de ocio y tiempo libre. | ①           | ②    | ③                   | ④        | ⑤            |
| 11. Gracias a mi medicación puedo realizar mejor mis tareas de aseo personal.                              | ①           | ②    | ③                   | ④        | ⑤            |
| 12. Gracias a mi medicación puedo realizar mejor mis tareas cotidianas.                                    | ①           | ②    | ③                   | ④        | ⑤            |

C6. Esta sección se refiere al **seguimiento médico** de su enfermedad.

|                                                                                          | No,<br>nada | Algo | Ni mucho<br>no poco | Bastante | Sí,<br>mucho |
|------------------------------------------------------------------------------------------|-------------|------|---------------------|----------|--------------|
| 13. Mi médico me ha informado con detalle acerca de mi enfermedad.                       | ①           | ②    | ③                   | ④        | ⑤            |
| 14. Mi médico me ha informado acerca de la manera de tratar correctamente mi enfermedad. | ①           | ②    | ③                   | ④        | ⑤            |

C7. Para finalizar, se incluyen unas preguntas acerca de su **opinión general** respecto a la medicación y su estado de salud.

|                                                               | No,<br>nada | Algo | Ni mucho<br>no poco | Bastante | Sí,<br>mucho |
|---------------------------------------------------------------|-------------|------|---------------------|----------|--------------|
| 15. Tengo intención de continuar utilizando este tratamiento. | ①           | ②    | ③                   | ④        | ⑤            |
| 16. Me siento a gusto con mi tratamiento.                     | ①           | ②    | ③                   | ④        | ⑤            |
| 17. En general, me siento satisfecho con el tratamiento.      | ①           | ②    | ③                   | ④        | ⑤            |

## Adherencia al tratamiento

- En los últimos 2 meses, ¿ha olvidado tomar la medicación (fármaco objeto a estudio)?

☐ Sí.

☐ No.

- Grado de cumplimentación semanal.

Nº pastillas tomadas: \_\_\_\_\_ pastillas

Nº de pastillas prescritas: \_\_\_\_\_ pastillas

$$\% \text{ Adhesión} = \left( \frac{\text{Nº pastillas tomadas}}{\text{Nº de pastillas prescritas}} \right) \times 100$$

- Con ayuda de su farmacéutico, ¿Cuál sería su tasa de posesión de medicamentos (TPM)? *(Se refiere al porcentaje de días que el paciente tiene la medicación disponible, y se calcula mediante la siguiente fórmula)*

$$TPM = \frac{\text{Días con medicación disponible según retirada}}{\text{Número de días del intervalo}}$$

PARA ELLO:

-Días con medicación disponible: el número de días que el paciente tiene medicación disponible desde inicio al fin del estudio, teniendo en cuenta su pauta y el momento de la medicación retirada. \_\_\_\_\_ días

-Nº días del intervalo: tiempo de seguimiento desde inicio al fin del estudio. \_\_\_\_\_ días

## Evaluación del servicio

- ¿Le ha parecido **útil** el servicio recibido?

|           |   |   |   |   |   |   |   |   |          |
|-----------|---|---|---|---|---|---|---|---|----------|
| 1         | 2 | 3 | 4 | 5 | 6 | 7 | 8 | 9 | 10       |
| Nada útil |   |   |   |   |   |   |   |   | Muy útil |

- ¿Recomendaría este servicio? *(Seleccione sólo una opción).*

- ☐ Sí.
- ☐ No.

- Este **servicio le ha ayudado** a: *(puede seleccionar varias respuestas).*

- ☐ Mejorar la toma del medicamento.
- ☐ Comprender mejor cómo actúa el medicamento.
- ☐ Resolver dudas sobre el medicamento.
- ☐ Identificar y/o solucionar mejor los efectos secundarios.
- ☐ Mejorar mi estado de salud.

- ¿Repetiría este servicio si le prescribiera otro nuevo medicamento?

- ☐ Sí.
- ☐ No.

- Observaciones:
