# Supplementary material for: Effectiveness and cost-effectiveness of a pragmatic clinical trial of the New Medicine Service intervention in Spanish community pharmacies
Source: Research Square preprint supplement (doi:10.21203/rs.3.rs-6871385/v1), 2025-07-23
Supplement: Supplementary file 2 [file b8981d6613362097b53fdf58.pdf]

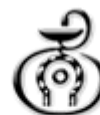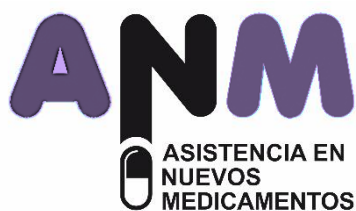

## CUESTIONARIO ASISTENCIA EN NUEVOS TRATAMIENTOS

# 3

### MEDIDA FINAL 6 MESES

Nombre y apellidos paciente: \_\_\_\_\_

DNI: \_\_\_\_\_

Teléfono: \_\_\_\_\_

Fecha segunda medición: \_\_\_\_ / \_\_\_\_ / \_\_\_\_

Código AXONFARMA<sup>1</sup>: \_\_\_\_\_

¿El paciente ha cambiado el tratamiento a estudio en los 6 últimos meses?

- ☐ Sí. -----> *Fin de cuestionario. Causa de abandono del estudio.*
- ☐ No.

En vigencia con el Reglamento Europeo de Protección de Datos (2016/679) los datos obtenidos serán de carácter confidencial, éstos datos serán organizados con un número asignado. Los datos recogidos estarán anonimizados y estarán a disposición del equipo de investigación de este estudio **“Efectividad de una intervención para mejorar la adherencia al tratamiento a nuevos medicamentos desde la farmacia comunitaria”**, para el posterior desarrollo de informes y publicaciones dentro de revistas científicas. La información recopilada no será utilizada para ningún otro propósito.

---

<sup>1</sup> Sólo en farmacias intervención

## Características clínicas

- Enfermedad objeto a estudio. (Seleccione sólo una opción).

- ☐ Hipertensión.
- ☐ EPOC.
- ☐ Diabetes.
- ☐ Anticoagulados.

- (SÓLO CONTESTAR SI HIPERTENSIÓN) Valor de la presión arterial:

-Presión máxima (sistólica):  mm Hg

-Presión mínima (diastólica):  mm Hg

- (SÓLO CONTESTAR SI EPOC)

|                                                                               |           |                                                                                     |
|-------------------------------------------------------------------------------|-----------|-------------------------------------------------------------------------------------|
| Nunca toso                                                                    | ① ② ③ ④ ⑤ | Siempre estoy tosiendo                                                              |
| No tengo flema (mucosidad) en el pecho                                        | ① ② ③ ④ ⑤ | Tengo el pecho completamente lleno de flema (mucosidad)                             |
| No siento ninguna opresión en el pecho                                        | ① ② ③ ④ ⑤ | Siento mucha opresión en el pecho                                                   |
| Cuando subo una pendiente o un tramo de escaleras, no me falta el aire        | ① ② ③ ④ ⑤ | Cuando subo una pendiente o un tramo de escaleras, me falta mucho el aire           |
| No me siento limitado para realizar actividades domésticas                    | ① ② ③ ④ ⑤ | Me siento muy limitado para realizar actividades domésticas                         |
| Me siento seguro al salir de casa a pesar de la afección pulmonar que padezco | ① ② ③ ④ ⑤ | No me siento nada seguro al salir de casa debido a la afección pulmonar que padezco |
| Duermo sin problemas                                                          | ① ② ③ ④ ⑤ | Tengo problemas para dormir debido a la enfermedad pulmonar que padezco             |
| Tengo mucha energía                                                           | ① ② ③ ④ ⑤ | No tengo ninguna energía                                                            |

## Calidad de vida relacionada con la salud (EQ-5D)

Debajo de cada enunciado, **marque UNA casilla**, la que mejor describe su salud **HOY**.

### **B1. MOVILIDAD**

- No tengo problemas para caminar ----- ☐ (1)  
Tengo problemas leves para caminar ----- ☐ (2)  
Tengo problemas moderados para caminar ----- ☐ (3)  
Tengo problemas graves para caminar ----- ☐ (4)  
No puedo caminar ----- ☐ (5)

### **B2. AUTO-CUIDADO**

- No tengo problemas para lavarme o vestirme ----- ☐ (1)  
Tengo problemas leves para lavarme o vestirme ----- ☐ (2)  
Tengo problemas moderados para lavarme o vestirme ----- ☐ (3)  
Tengo problemas graves para lavarme o vestirme ----- ☐ (4)  
No puedo lavarme o vestirme ----- ☐ (5)

### **B3. ACTIVIDADES COTIDIANAS** (Ej.: trabajar, estudiar, hacer las tareas domésticas, actividades familiares o actividades durante el tiempo libre)

- No tengo problemas para realizar mis actividades cotidianas ----- ☐ (1)  
Tengo problemas leves para realizar mis actividades cotidianas ----- ☐ (2)  
Tengo problemas moderados para realizar mis actividades cotidianas ----- ☐ (3)  
Tengo problemas graves para realizar mis actividades cotidianas ----- ☐ (4)  
No puedo realizar mis actividades cotidianas ----- ☐ (5)

### **B4. DOLOR / MALESTAR**

- No tengo dolor ni malestar ----- ☐ (1)  
Tengo dolor o malestar leve ----- ☐ (2)  
Tengo dolor o malestar moderado ----- ☐ (3)  
Tengo dolor o malestar fuerte ----- ☐ (4)  
Tengo dolor o malestar extremo ----- ☐ (5)

### B5 .ANSIEDAD / DEPRESIÓN

- No estoy ansioso ni deprimido-----☐ (1)
- Estoy levemente ansioso o deprimido -----☐ (2)
- Estoy moderadamente ansioso o deprimido -----☐ (3)
- Estoy muy ansioso o deprimido-----☐ (4)
- Estoy extremadamente ansioso o deprimido-----☐ (5)

Nos gustaría conocer lo buena o mala que es su salud  
HOY.

La escala está numerada del 0 al 100.

100 representa la mejor salud que usted se pueda  
imaginar.

0 representa la peor salud que usted se pueda  
imaginar.

Marque con una X en la escala para indicar cuál es su  
estado de salud HOY.

Ahora, en la casilla que encontrará a continuación  
escriba el número que ha marcado en la escala.

B6. SU SALUD HOY

La mejor salud que  
usted se pueda imaginar

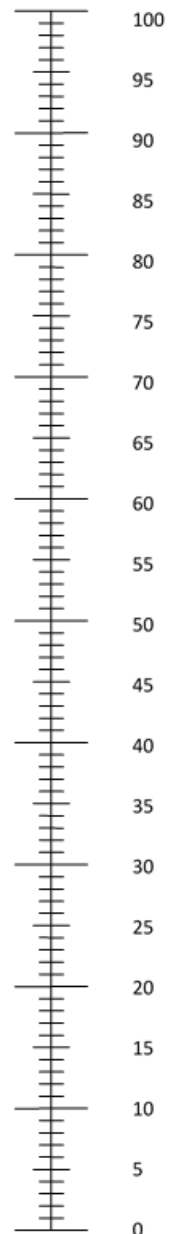

La peor salud  
que usted se pueda  
imaginar

## Adherencia al tratamiento

- En los últimos 6 meses, ¿ha olvidado tomar la medicación (fármaco objeto a estudio)?

☐ Sí.

☐ No.

- Grado de cumplimentación semanal.

Nº pastillas tomadas: \_\_\_\_\_ pastillas

Nº de pastillas prescritas: \_\_\_\_\_ pastillas

$$\% \text{ Adhesión} = \left( \frac{\text{Nº pastillas tomadas}}{\text{Nº de pastillas prescritas}} \right) \times 100$$

- Con ayuda de su farmacéutico, ¿Cuál sería su tasa de posesión de medicamentos (TPM)? *(Se refiere al porcentaje de días que el paciente tiene la medicación disponible, y se calcula mediante la siguiente fórmula)*

$$TPM = \frac{\text{Días con medicación disponible según retirada}}{\text{Número de días del intervalo}}$$

PARA ELLO:

-Días con medicación disponible: el número de días que el paciente tiene medicación disponible desde inicio al fin del estudio, teniendo en cuenta su pauta y el momento de la medicación retirada. \_\_\_\_\_ días

-Nº días del intervalo: tiempo de seguimiento desde inicio al fin del estudio. \_\_\_\_\_ días

## Consumo de servicios

Queremos saber el consumo de servicios en los últimos 6 meses, SOLO de aquellos que estén relacionados con el problema por el que toma la medicación y/o la propia medicación

En los últimos 6 meses, ¿Cuántas visitas ha realizado a su médico de familia?  
\_\_\_\_\_ visitas

En los últimos 6 meses, ¿cuántas veces su médico de familia lo ha visitado en su domicilio? \_\_\_\_\_ visitas

En los últimos 6 meses, ¿cuántas visitas ha realizado al médico especialista?  
\_\_\_\_\_ visitas

Respecto a las urgencias, ¿cuántas veces ha tenido que acudir a urgencias de su centro de salud? \_\_\_\_\_ visitas

¿Y a urgencias del hospital? \_\_\_\_\_ visitas

En los últimos 6 meses, ¿ha sido ingresado alguna vez?

☐ Sí.

☐ No.

Si ha sido ingresado, ¿durante cuánto tiempo? \_\_\_\_\_ días

¿Cuál fue el motivo del ingreso?

En cuanto a su medicación a estudio que le recetaron hace unos seis meses, ¿ha tenido que modificarla?

☐ Sí.

☐ No.
