# Supplementary material for: Effectiveness and cost-effectiveness of a pragmatic clinical trial of the New Medicine Service intervention in Spanish community pharmacies
Source: Research Square preprint supplement (doi:10.21203/rs.3.rs-6871385/v1), 2025-07-23
Supplement: Supplementary file 3 [file beb68a169f788ef0fc6ff54b.pdf]

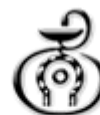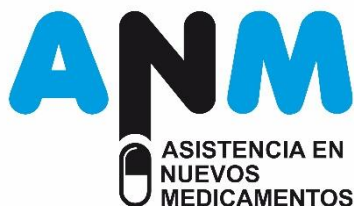

## CUESTIONARIO ASISTENCIA EN NUEVOS TRATAMIENTOS

# 1

### PRIMERA MEDICIÓN NIVEL BASAL

Nombre y apellidos paciente:

DNI:

Teléfono:

Fecha primera medición:

Código AXONFARMA<sup>1</sup>:

En vigencia con el Reglamento Europeo de Protección de Datos (2016/679) los datos obtenidos serán de carácter confidencial, éstos datos serán organizados con un número asignado. Los datos recogidos estarán anonimizados y estarán a disposición del equipo de investigación de este estudio **“Efectividad de una intervención para mejorar la adherencia al tratamiento a nuevos medicamentos desde la farmacia comunitaria”**, para el posterior desarrollo de informes y publicaciones dentro de revistas científicas. La información recopilada no será utilizada para ningún otro propósito.

---

<sup>1</sup> Sólo en farmacias intervención

## Características sociodemográficas

---

- Edad. (En años):  años

- Sexo. (Seleccione sólo una opción).

☐ Hombre.

☐ Mujer.

- Número de hijos/as.  hijos/as.

- Aproximadamente, ¿Cuántas amigas/os íntimos o familiares cercanos tiene usted? (Apoyo social):

## Características clínicas

---

- Enfermedad objeto a estudio. (Seleccione sólo una opción).

☐ Hipertensión.

☐ EPOC.

☐ Diabetes.

☐ Anticoagulados.

- (SÓLO CONTESTAR SI HIPERTENSIÓN) Valor de la presión arterial:

-Presión máxima (sistólica):  mm Hg

-Presión mínima (diastólica):  mm Hg

- (SÓLO CONTESTAR SI EPOC)

|                                                                               |           |                                                                                     |
|-------------------------------------------------------------------------------|-----------|-------------------------------------------------------------------------------------|
| Nunca toso                                                                    | ① ② ③ ④ ⑤ | Siempre estoy tosiendo                                                              |
| No tengo flema (mucosidad) en el pecho                                        | ① ② ③ ④ ⑤ | Tengo el pecho completamente lleno de flema (mucosidad)                             |
| No siento ninguna opresión en el pecho                                        | ① ② ③ ④ ⑤ | Siento mucha opresión en el pecho                                                   |
| Cuando subo una pendiente o un tramo de escaleras, no me falta el aire        | ① ② ③ ④ ⑤ | Cuando subo una pendiente o un tramo de escaleras, me falta mucho el aire           |
| No me siento limitado para realizar actividades domésticas                    | ① ② ③ ④ ⑤ | Me siento muy limitado para realizar actividades domésticas                         |
| Me siento seguro al salir de casa a pesar de la afección pulmonar que padezco | ① ② ③ ④ ⑤ | No me siento nada seguro al salir de casa debido a la afección pulmonar que padezco |
| Duermo sin problemas                                                          | ① ② ③ ④ ⑤ | Tengo problemas para dormir debido a la enfermedad pulmonar que padezco             |
| Tengo mucha energía                                                           | ① ② ③ ④ ⑤ | No tengo ninguna energía                                                            |

## Calidad de vida relacionada con la salud (EQ-5D)

Debajo de cada enunciado, **marque UNA casilla**, la que mejor describe su salud **HOY**.

### **B1. MOVILIDAD**

- No tengo problemas para caminar ----- ☐ (1)  
Tengo problemas leves para caminar ----- ☐ (2)  
Tengo problemas moderados para caminar ----- ☐ (3)  
Tengo problemas graves para caminar ----- ☐ (4)  
No puedo caminar ----- ☐ (5)

### **B2. AUTO-CUIDADO**

- No tengo problemas para lavarme o vestirme ----- ☐ (1)  
Tengo problemas leves para lavarme o vestirme ----- ☐ (2)  
Tengo problemas moderados para lavarme o vestirme ----- ☐ (3)  
Tengo problemas graves para lavarme o vestirme ----- ☐ (4)  
No puedo lavarme o vestirme ----- ☐ (5)

### **B3. ACTIVIDADES COTIDIANAS** (Ej.: trabajar, estudiar, hacer las tareas domésticas, actividades familiares o actividades durante el tiempo libre)

- No tengo problemas para realizar mis actividades cotidianas ----- ☐ (1)  
Tengo problemas leves para realizar mis actividades cotidianas ----- ☐ (2)  
Tengo problemas moderados para realizar mis actividades cotidianas ----- ☐ (3)  
Tengo problemas graves para realizar mis actividades cotidianas ----- ☐ (4)  
No puedo realizar mis actividades cotidianas ----- ☐ (5)

### **B4. DOLOR / MALESTAR**

- No tengo dolor ni malestar ----- ☐ (1)  
Tengo dolor o malestar leve ----- ☐ (2)  
Tengo dolor o malestar moderado ----- ☐ (3)  
Tengo dolor o malestar fuerte ----- ☐ (4)  
Tengo dolor o malestar extremo ----- ☐ (5)

### B5 .ANSIEDAD / DEPRESIÓN

- No estoy ansioso ni deprimido----- ☐ (1)
- Estoy levemente ansioso o deprimido ----- ☐ (2)
- Estoy moderadamente ansioso o deprimido ----- ☐ (3)
- Estoy muy ansioso o deprimido----- ☐ (4)
- Estoy extremadamente ansioso o deprimido----- ☐ (5)

Nos gustaría conocer lo buena o mala que es su salud  
HOY.

La escala está numerada del 0 al 100.

100 representa la mejor salud que usted se pueda  
imaginar.

0 representa la peor salud que usted se pueda  
imaginar.

Marque con una X en la escala para indicar cuál es su  
estado de salud HOY.

Ahora, en la casilla que encontrará a continuación  
escriba el número que ha marcado en la escala.

B6. SU SALUD HOY

La mejor salud que  
usted se pueda imaginar

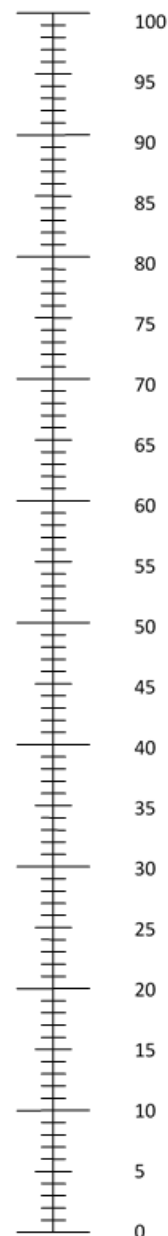

La peor salud  
que usted se pueda  
imaginar
